# Supplementary material
Source: ML conference proceedings conference paper supplement (https://openreview.net/forum?id=xOBMyvoMQw8)

Bias

$4 \times 10^{-1}$

$3 \times 10^{-1}$

$2 \times 10^{-1}$

$10^{-1}$

0

5

10

15

20

25

30

Number of Data Pass

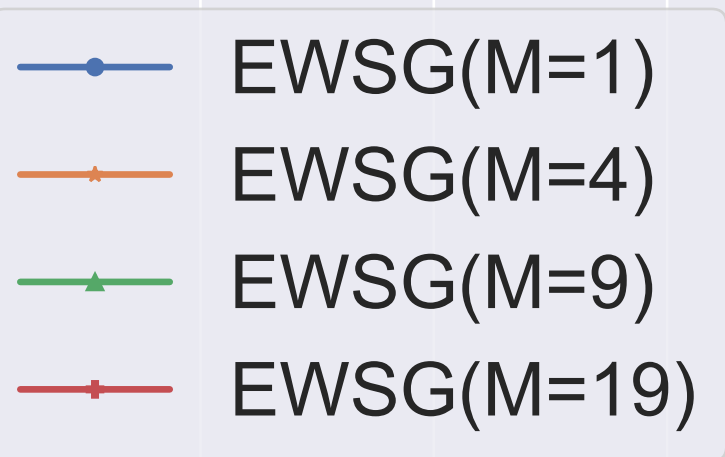

Supplement: supplementary_material [file attachment]

Standard Deviation

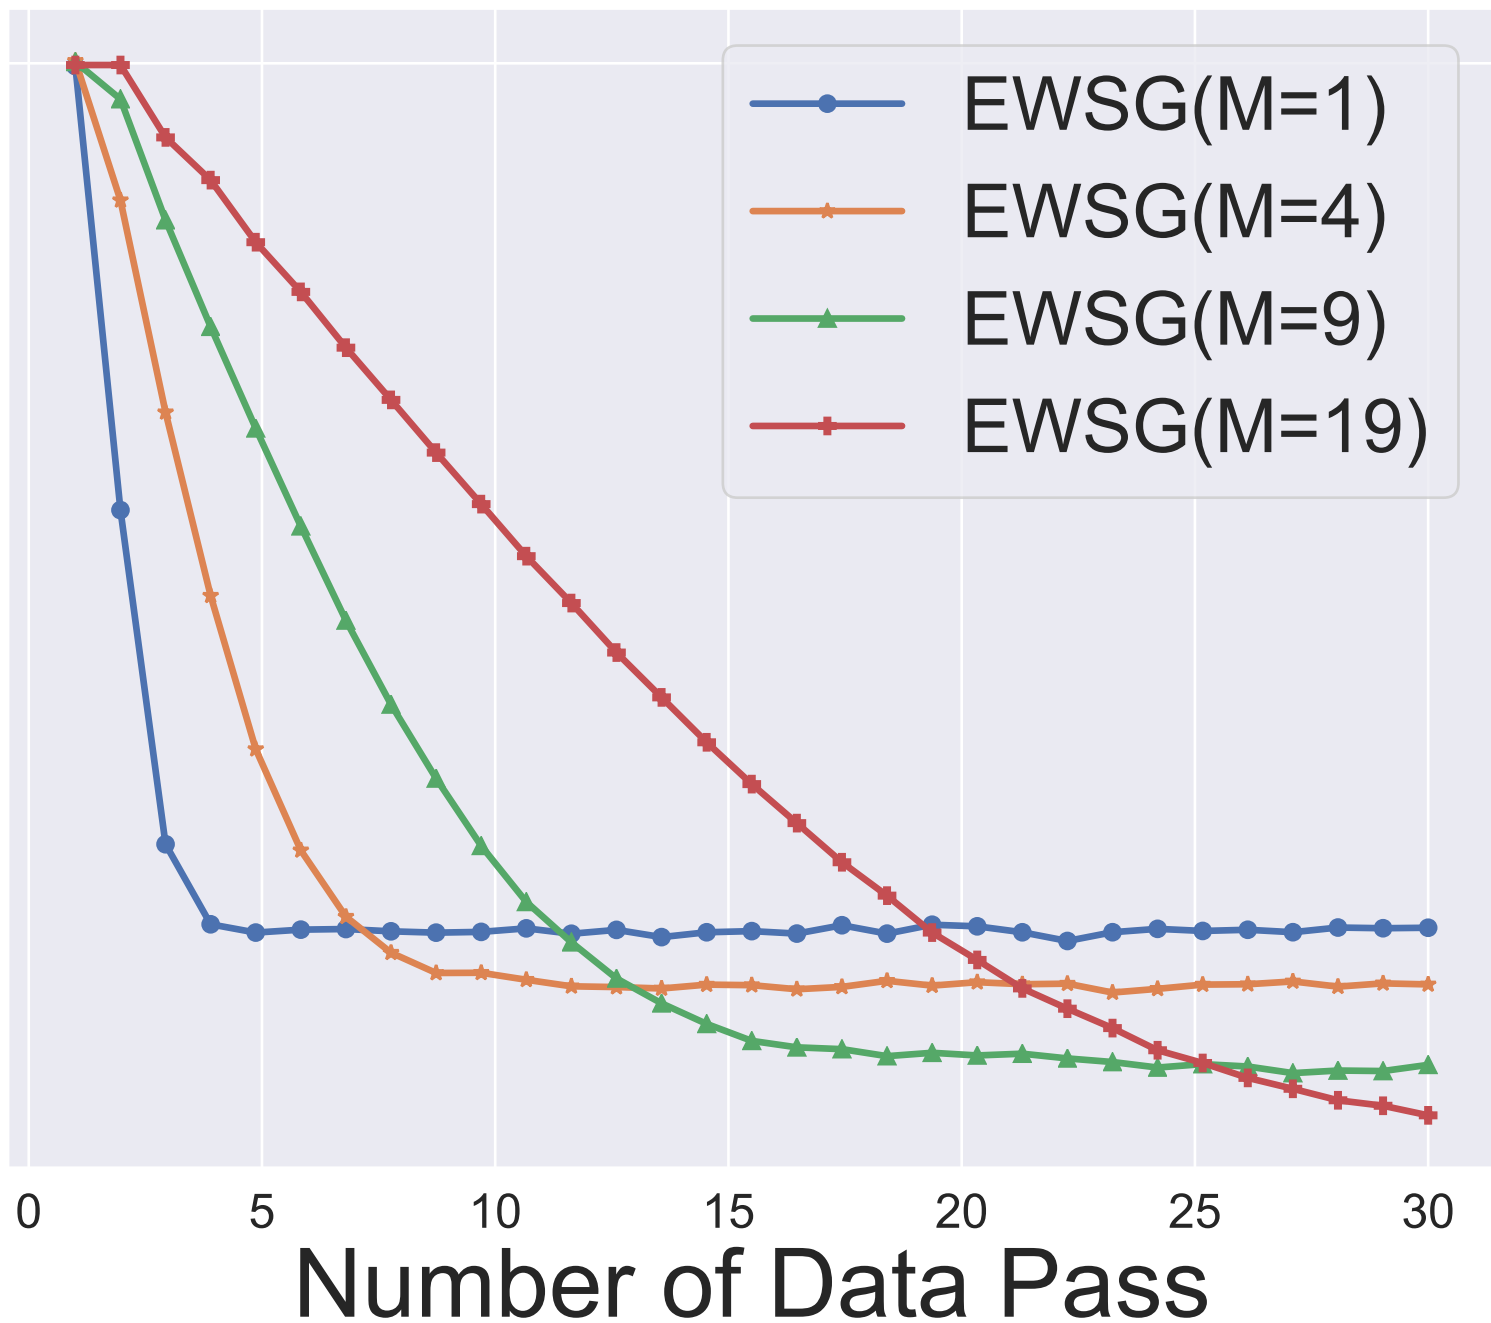

Supplement: supplementary_material [file attachment]

KL Divergence

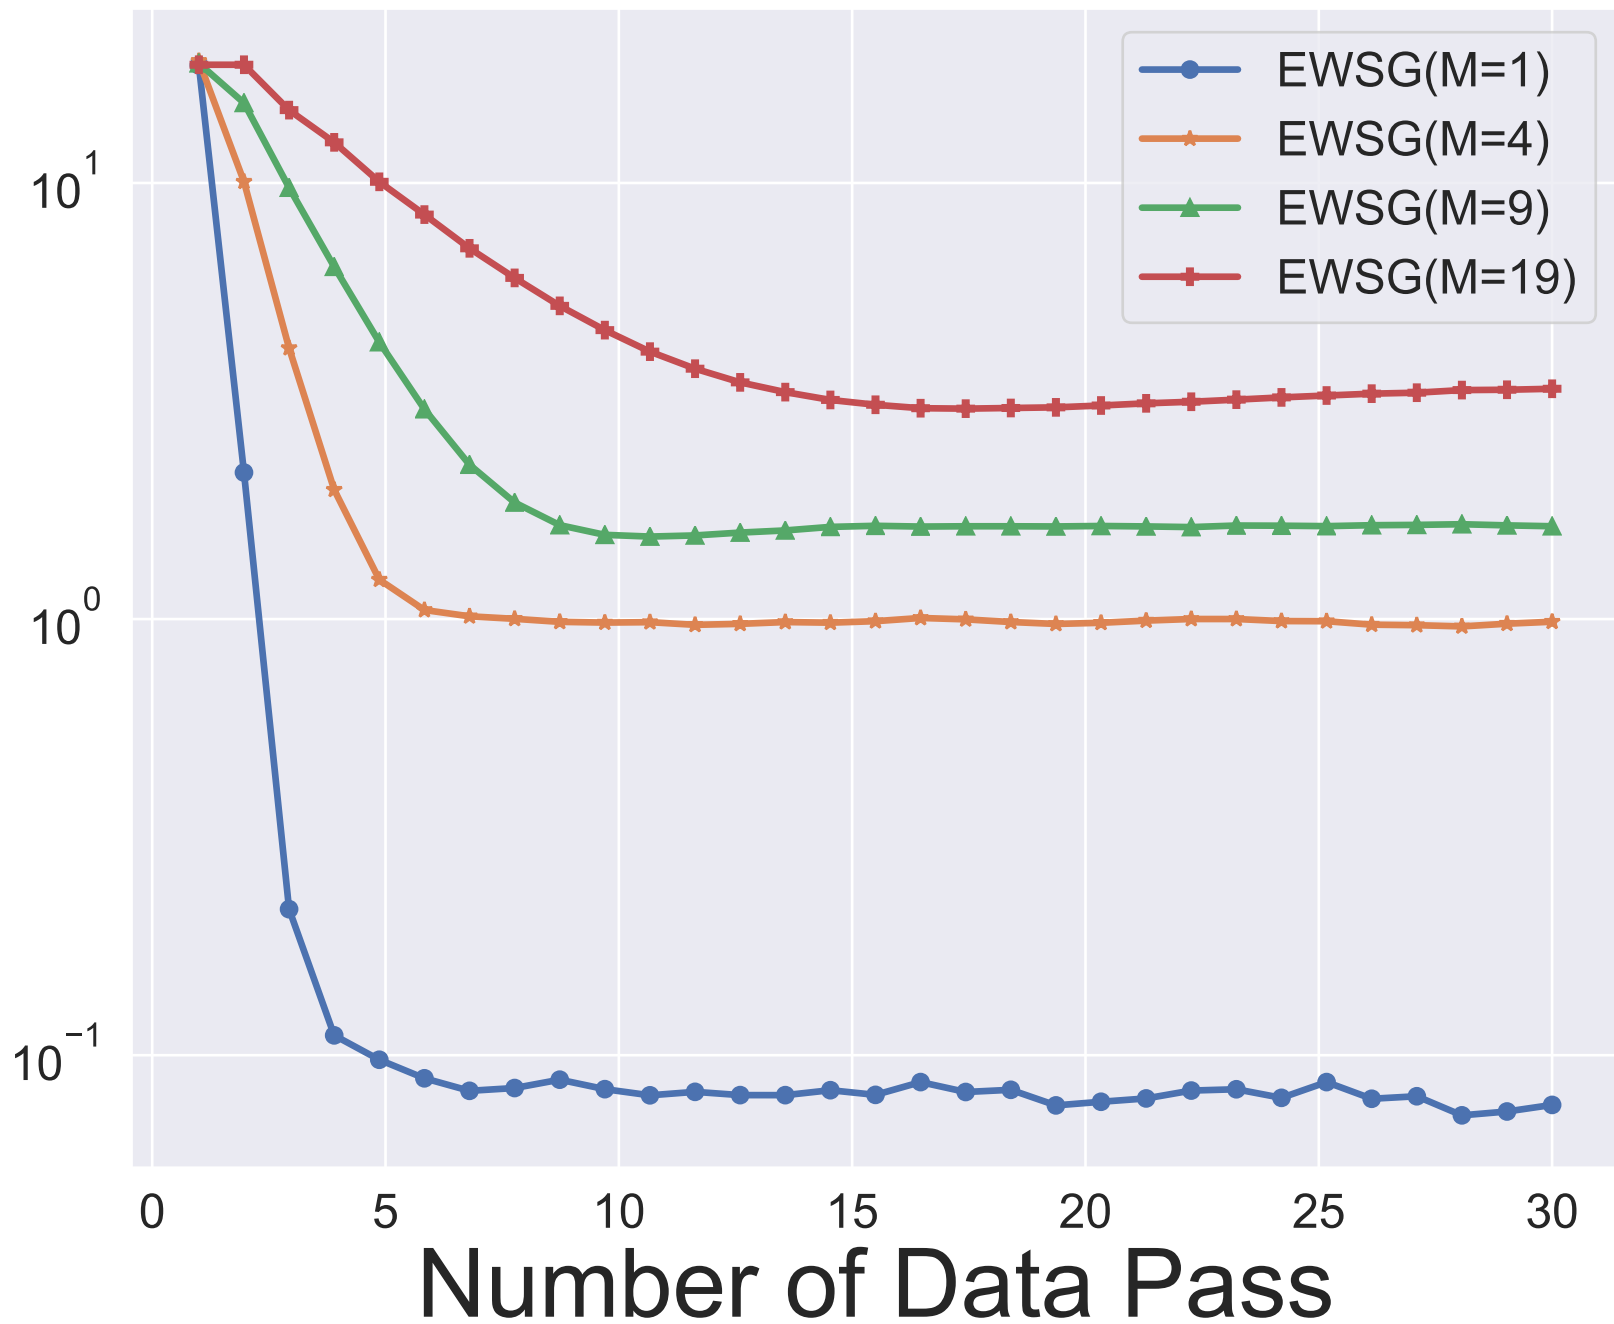

Supplement: supplementary_material [file attachment]

KL Divergence

$10^1$

$10^0$

$10^{-1}$

0

5

10

15

20

25

30

Number of Data Pass

- SGLD
- pSGLD
- SVRG-LD
- SGULD
- EWSG

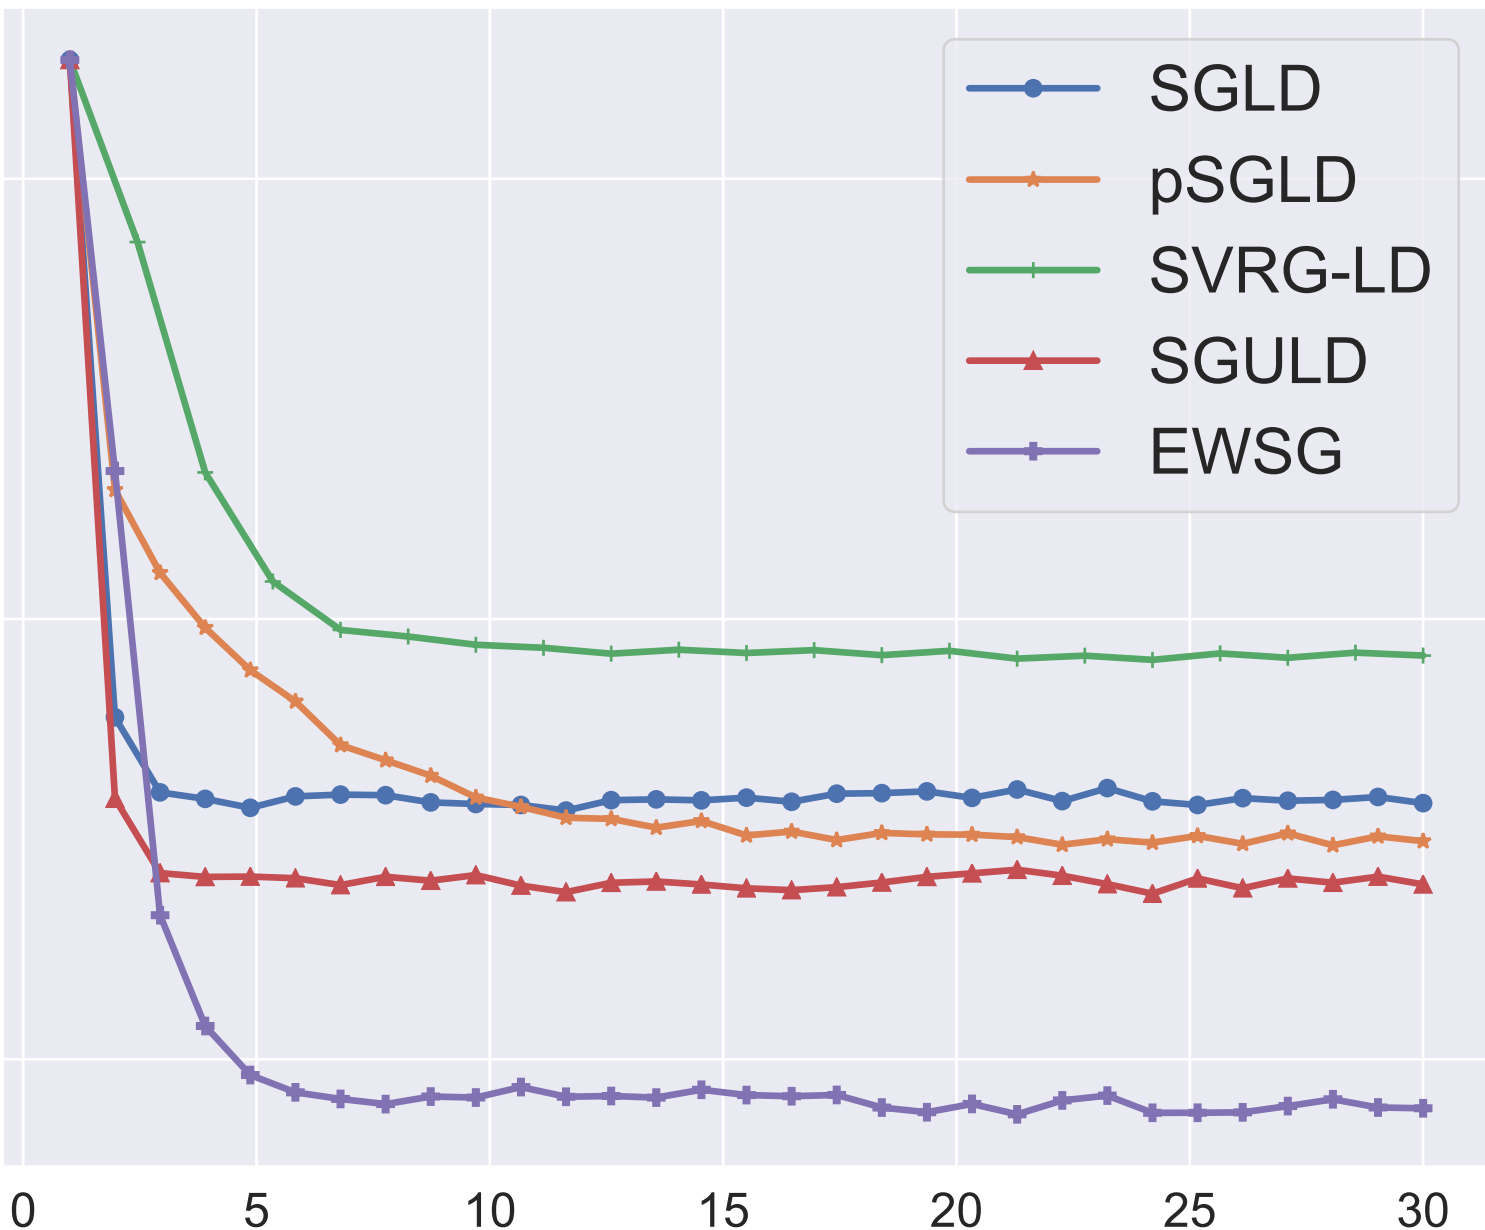

Supplement: supplementary_material [file attachment]

KL Divergence

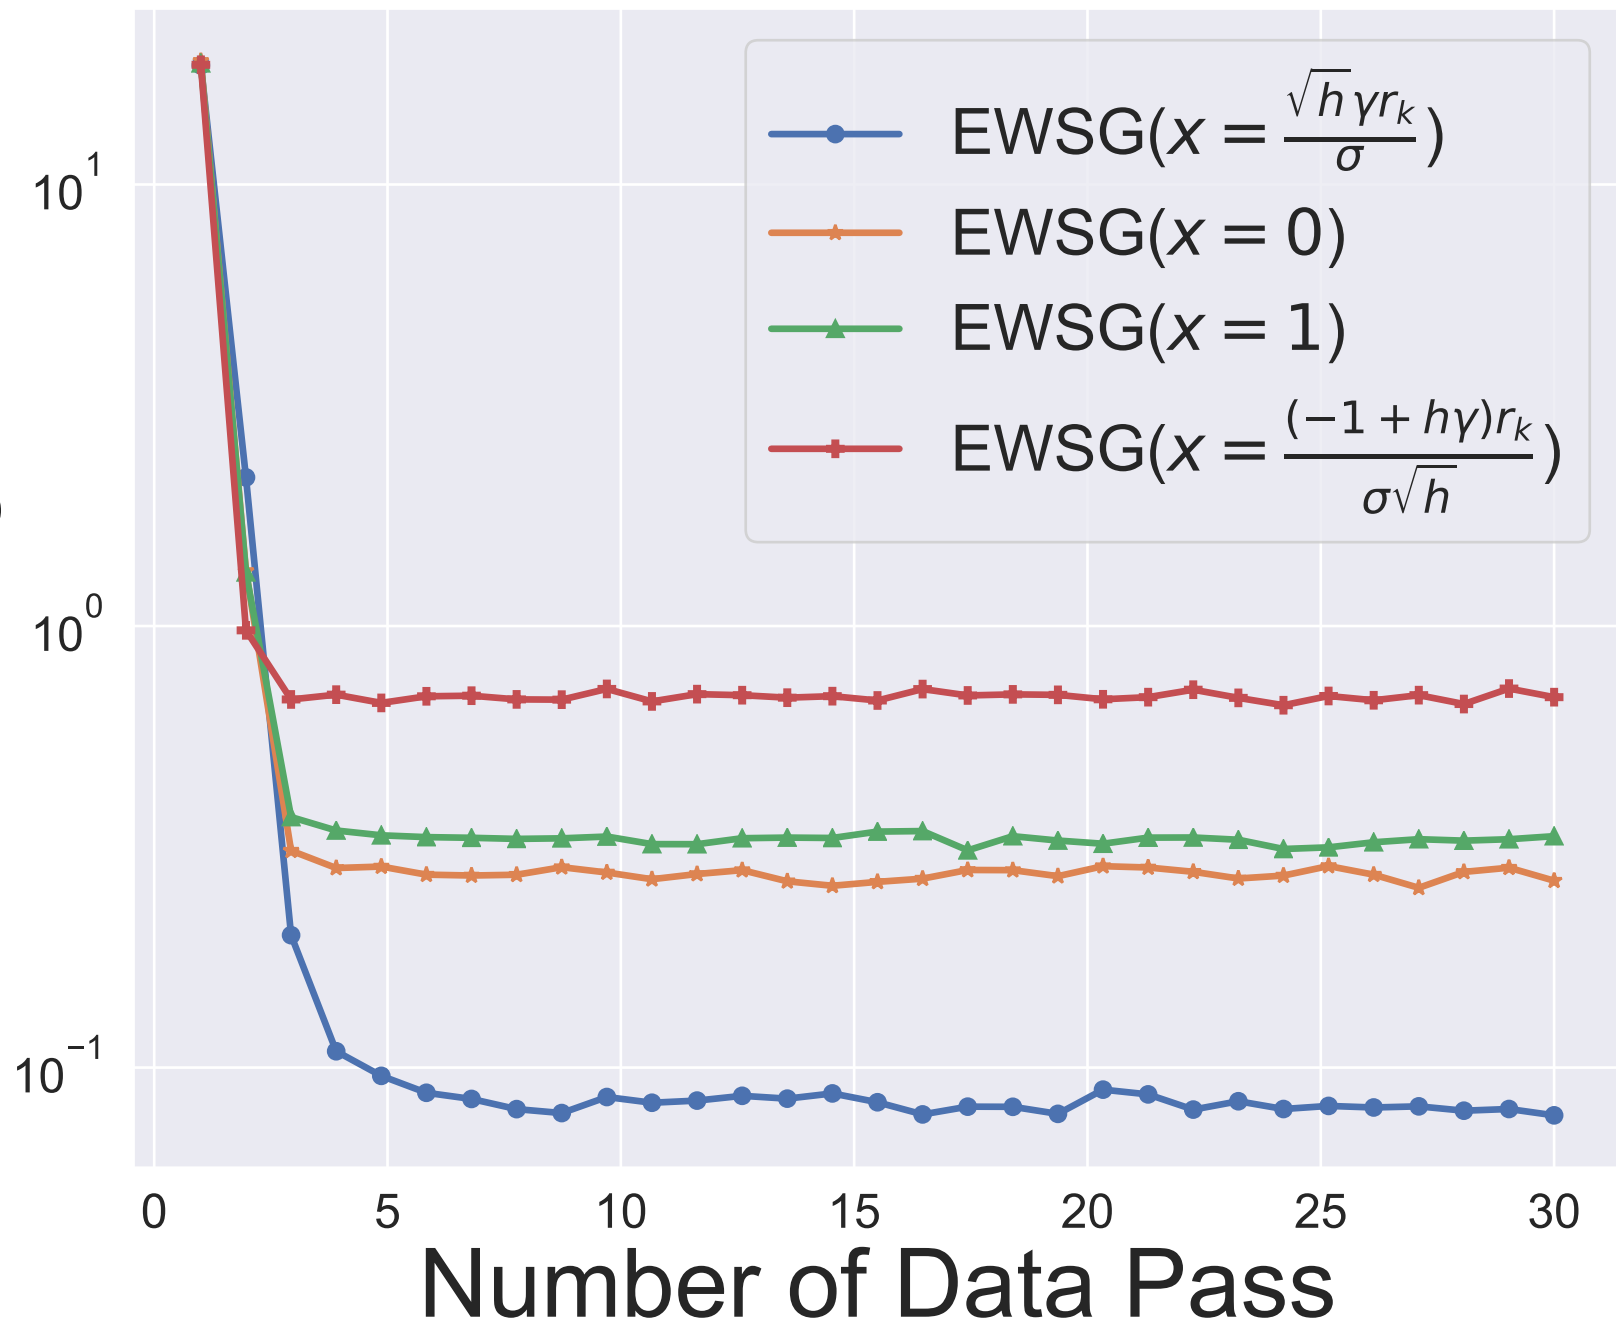

Supplement: supplementary_material [file attachment]
